# Supplementary material for: METTL3 Contributes to Osteosarcoma Progression by Increasing DANCR mRNA Stability via m6A Modification
Source: Front Cell Dev Biol. 2022 Jan 12;9:784719. doi: 10.3389/fcell.2021.784719 (PMC8790117; doi:10.3389/fcell.2021.784719)
Supplement: Supplementary file 2 [file Table1.XLSX]

## Sheet: Sheet1
Gene Name	Forward: Sequence 5’ to 3’	Reverse: Sequence 5’ to 3’
Mettle3	ACCCTGACAGATGATGAGATGC	CGTTCATACCCCCAGAGGTTTAG
DANCR	CGGAGGTGGATTCTGTTAGG	TCGGTGTAGCAAGTCTGGTG
GAPDH	ACACCCACTCCTCCACCTTT	TTACTCCTTGGAGGCCATGT
U6	TGCGGGTGCTCGCTTCGCAGC	CCAGTGCAGGGTCCGAGGT
